# Supplementary material
Source: publisher figshare collection journal article supplement (https://sage.figshare.com/ndownloader/files/14729213)
Supplement: Supplementary file 1 [file 14729213]

Supplementary File: List of interventions

| **Intervention** | **Description** | **Dates** | **Reference** |
| --- | --- | --- | --- |
| Rise in antidepressant use begins | Rise in antidepressant use with introduction of SSRIs | 1992+ | Mant et al. (2004) |
| 1st National Mental Health Plan | A collaborative framework between all levels of government to pursue 12 priority areas | 1993-1998 | Australian Government Department of Health (2001a) |
| National Youth Suicide Prevention Strategy | Australian government initiative to prevent youth suicide by building capacity of existing services and programs | 1995-1999 | Morrell et al. (2007) |
| Gun buyback | National gun law reform to remove semi-automatic and pump-action shotguns and rifles from civilian possession | 1996+ | Chapman et al. (2006) |
| SPHERE | National project to train GPs in better management of depression | 1998-circa 2000 | Hickie et al. (1998) |
| 2nd National Mental Health Plan | A collaborative framework between all levels of government to build on the first plan, and with 3 additional priority areas | 1998-2003 | Australian Government Department of Health (2001b) |
| Beyondblue | A national non-government organization aiming to reduce the impact of depression on the community | 2000+ | Hickie (2001) |
| National Suicide Prevention Strategy | Australian government initiative to prevent deaths by suicide and suicidal behaviour across the lifespan, taking a whole-of-community approach | 2000+ | Australian Government Department of Health (2014) |
| MindMatters | A national mental health promotion program for Australian schools | 2000+ | Wynn et al. (2000) |
| Better Outcomes | The Better Outcomes in Mental Health Care initiative provided GPs with training and incentives to deliver structured quality care, and access to specialists | 2001+ | Pirkis et al. (2004) |
| Media reporting guidelines | The Mindframe Media and Mental Health Project developed guidelines on reporting on suicide and mental illness, together with a national dissemination strategy | 2002+ | Skehan, Greenhalgh, Hazell and Pirkis (2006) |
| 3rd National Mental Health Plan | A collaborative framework between all levels of government outlining a framework for policy development and activity in mental health reform | 2003-2008 | Australian Government Department of Health (2005) |
| Headspace | A national youth mental health initiative providing early intervention services | 2006+ | McGorry et al. (2007) |
| Better Access | The Better Access to Psychiatrists, Psychologists and General Practitioners through the MBS initiative provided better access to mental health practitioners through Medicare | 2006+ | Australian Government Department of Health (2018) |
| 4th National Mental Health Plan | A plan for collaborative government action on mental health, including service improvements | 2009-2014 | Australian Government Department of Health (2009) |
| National Mental Health Commission | Australian Government organization to provide independent reports and advice to the community and government on what is working and what is not | 2012+ | Australian Government National Mental Health Commission (2014) |
| New National Suicide Prevention Strategy | Australian Government plan involving a systems-based regional approach to suicide prevention. | 2015+ | Australian Government Department of Health (2016) |

**References**

Australian Government Department of Health (2001a) First National Mental Health Plan. Available at: [http://www.health.gov.au/internet/publications/publishing.nsf/Content/mental-pubs-i-midrev2-toc~mental-pubs-i-midrev2-2~mental-pubs-i-midrev2-2-fir](http://www.health.gov.au/internet/publications/publishing.nsf/Content/mental-pubs-i-midrev2-toc~mental-pubs-i-midrev2-2~mental-pubs-i-midrev2-2-fir%20)  (accessed 13 February 2019).

Australian Government Department of Health (2001b) Second National Mental Health Plan. Available at: http://www.health.gov.au/internet/publications/publishing.nsf/Content/mental-pubs-i-midrev2-toc~mental-pubs-i-midrev2-2~mental-pubs-i-midrev2-2-sec (accessed 13 February 2019).

Australian Government Department of Health (2005) 1.4—National Mental Health Plan 2003-2008. Available at: http://www.health.gov.au/internet/publications/publishing.nsf/Content/mental-pubs-n-infopri2-toc~mental-pubs-n-infopri2-pt1~mental-pubs-n-infopri2-pt1-4 (accessed 13 February 2019).

Australian Government Department of Health (2009) Fourth national mental health plan: an agenda for collaborative government action in mental health 2009-2014. Available at: http://www.health.gov.au/internet/main/publishing.nsf/Content/mental-pubs-f-plan09 (accessed 13 February 2019).

Australian Government Department of Health (2014) 3.3—National Suicide Prevention Strategy. Available at: http://www.health.gov.au/internet/publications/publishing.nsf/Content/suicide-prevention-activities-evaluation~background~national-suicide-prevention-strategy (accessed 13 February 2019).

Australian Government Department of Health (2016) National suicide prevention strategy. Available at: http://www.health.gov.au/internet/main/publishing.nsf/Content/mental-nsps (accessed 13 February 2019).

Australian Government National Mental Health Commission (2014) About Us. Available at: http://www.health.gov.au/mentalhealth-betteraccess (accessed 13 February 2019).

Australian Government Department of Health (2018) Better Access to Psychiatrists, Psychologists and General Practitioners through the MBS (Better Access) initiative. Available at: http://www.health.gov.au/mentalhealth-betteraccess (accessed 13 February 2019).

Chapman S, Alpers P, Agho K, Jones M (2006) Australia’s 1996 gun law reforms: faster falls in firearm deaths, firearm suicides, and a decade without mass shootings. *Injury Prevention* 12: 365-372.

Hickie I (2001) “beyondblue: the national depression initiative”. *Australasian Psychiatry* 9: 147-150.

Hickie I, Hadzi-Pavlovic D, Scott E, et al. (1998) SPHERE: a national depression project. *Australasian Psychiatry* 6, 248-250.

McGorry PD, Tanti C, Stokes R, et al. (2007) *headspace*: Australia’s National Youth Mental Health Foundation—where young minds come first. *Medical Journal of Australia* 187: S68-S70.

Mant A, Rendle VA, Hall WD, et al. (2004) Making new choices about antidepressants in Australia: the long view 1975-2002. *Medical Journal of Australia* 181: S21-S24.

Morrell S, Page AN and Taylor RJ (2007) The decline in Australian young male suicide. *Social Science and Medicine* 64: 747-754.

Pirkis J, Kohn F, Morley B, Burgess P and Blashki G (2004) Better outcomes in mental health care? Primary Care Mental Health 2: 141-150.

Skehan J, Greenhalgh S, Hazell T and Pirkis J (2006) Reach, awareness and uptake of media guidelines for reporting suicide and mental illness: an Australian perspective. International Journal of Mental Health Promotion 8: 29-35.

Wynn J, Cahill H, Holdsworth R, Rowling L and Carson S (2000) MindMatters, a whole-school approach promoting mental health and wellbeing. *Australian and New Zealand Journal of Psychiatry* 34: 594-601.
